# Supplementary material for: Repair of critical-sized bone defects in rabbit femurs using graphitic carbon nitride (g-C3N4) and graphene oxide (GO) nanomaterials
Source: PubMed Central journal article supplement (PMC10070441; doi:10.1038/s41598-023-32487-7), 2023-04-03
Supplement: 41598_2023_32487_MOESM1_ESM.pdf [file 41598_2023_32487_MOESM1_ESM.pdf]

## Supplementary Figures

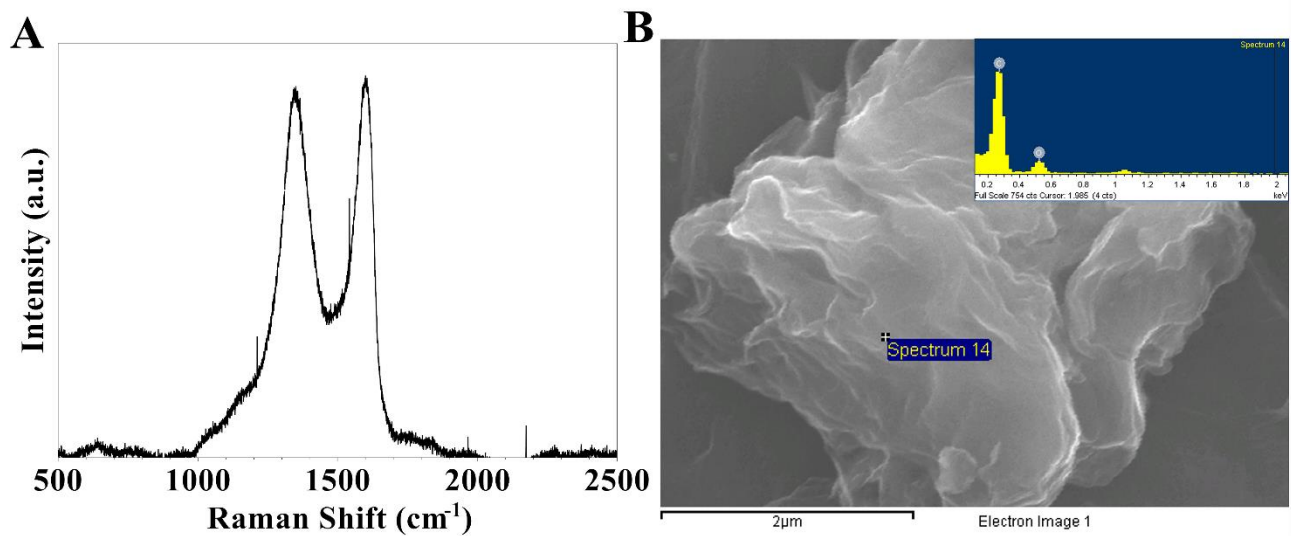

**Fig. supp 1.** A) Raman spectrum and B) SEM image and EDX analysis for GO.

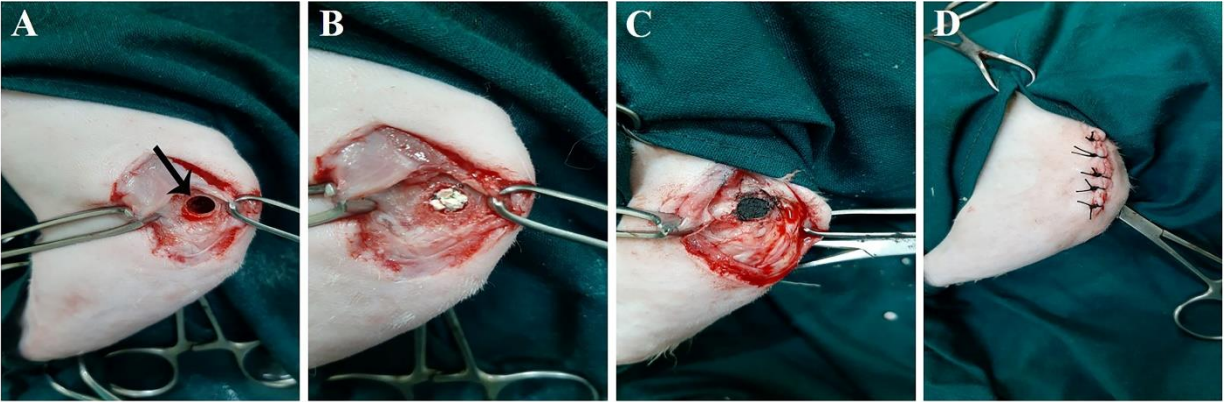

**Fig. supp 2.** Surgical procedure of femoral condyle bone defect induction and implantation of scaffolds; bone defect ( $\text{Ø } 5 \times 10 \text{ mm}$ ) (black arrow) (A), g-C<sub>3</sub>N<sub>4</sub> implantation (B), GO implantation (C), and wound closure (D).

## Bone density

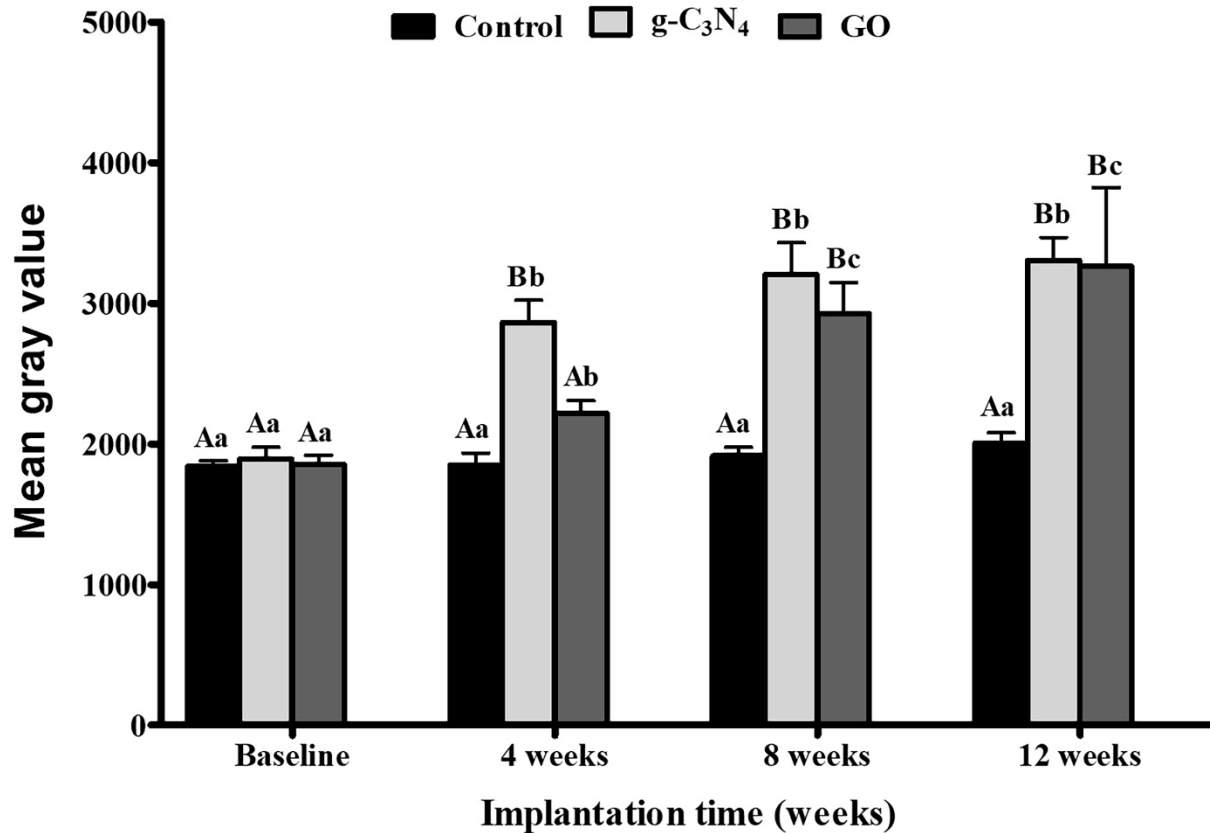

**Fig. supp 3.** Bone density using the mean gray value in different groups at week 4, 8, and 12 after the operation. Error bars  $\pm$  SD;  $n = 3$  for each group and time point. Bars with the same letter represent values that are not significantly different (two-way ANOVA followed by Tukey's HSD post hoc test). A, B, and C: significance between groups; a, b, and c: significance between time points.

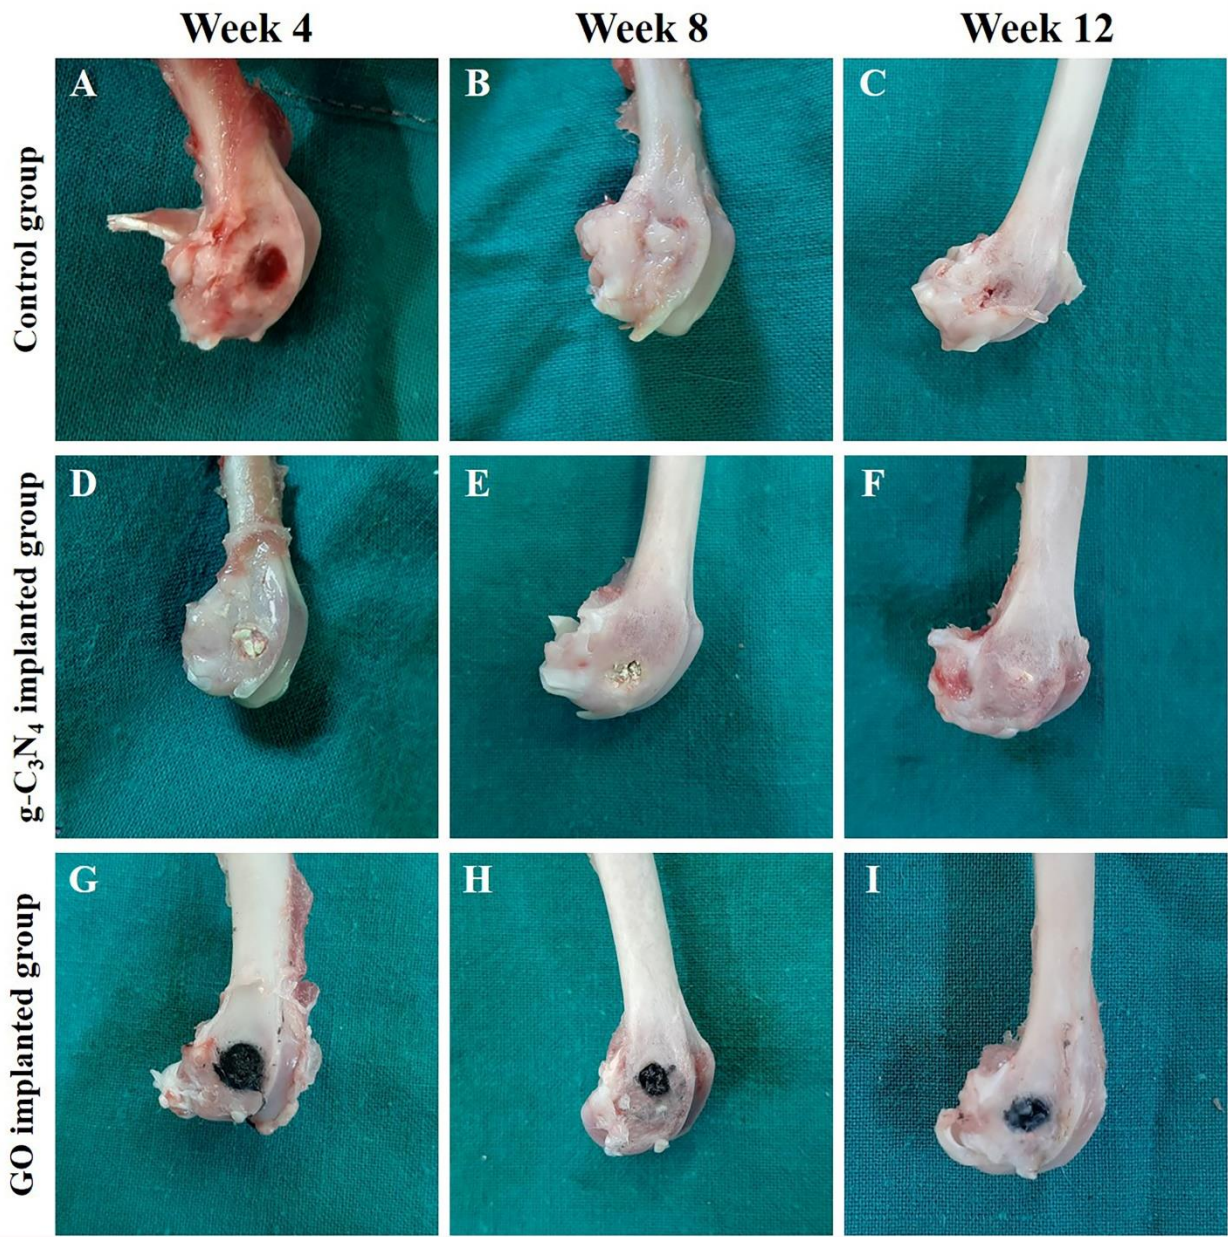

**Fig. supp 4.** Gross evaluation of the rabbit femoral bone defects of control (A-C), g-C<sub>3</sub>N<sub>4</sub> implanted (D-F), and GO (G-I) implanted groups at different implantation times.

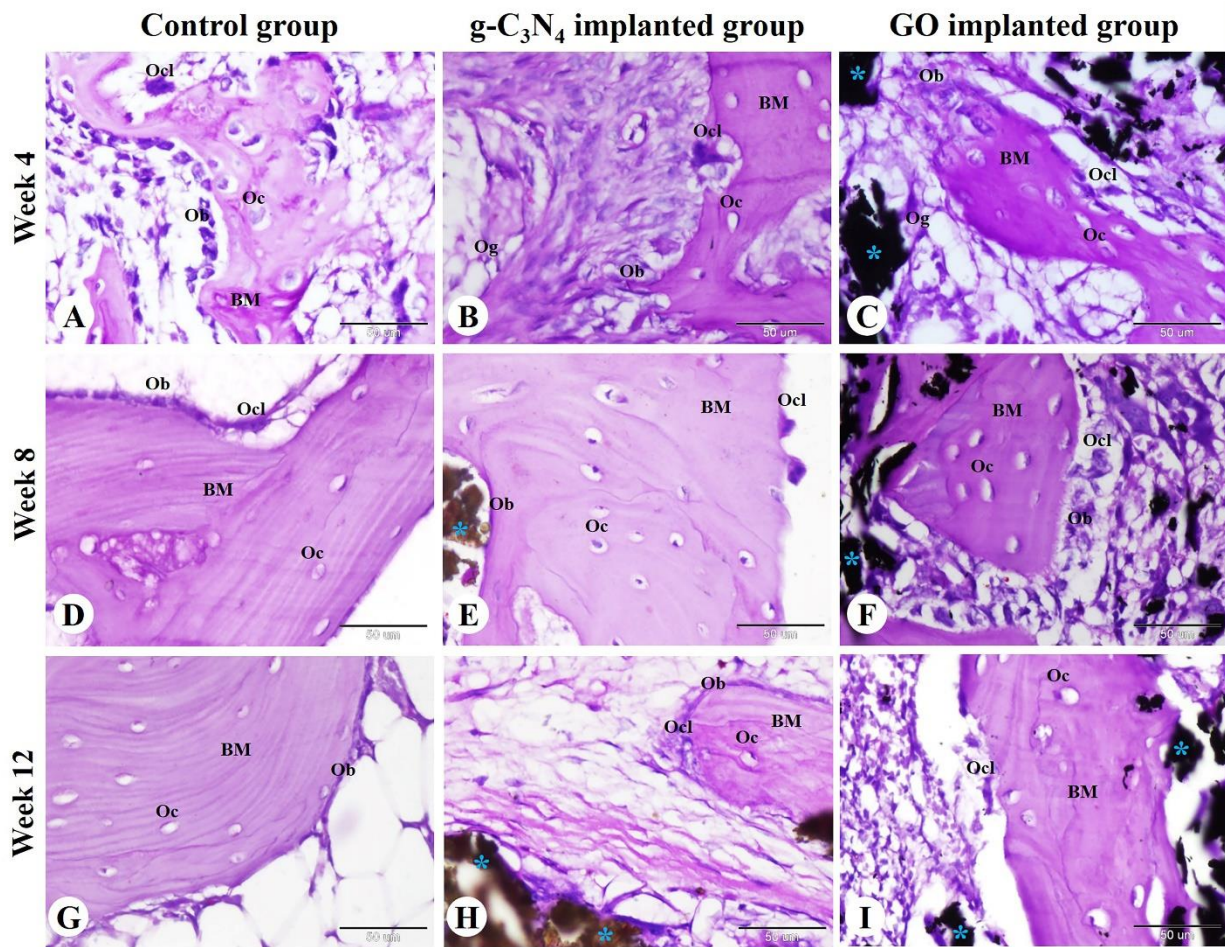

**Fig. supp 5.** Histological evaluation of rabbit femoral condyle defect stained with PAS & Hematoxylin. The repair site of the femoral condyle at week 4 (A-C), 8 (D-F), and 12 (G-I) after surgery in control,  $g-C_3N_4$  implanted, and GO implanted groups. Ob: osteoblast; Oc: osteocyte; Ocl: osteoclast; Og: osteogenic cells; BM: bone matrix; blue asterisks: implanted nanomaterial. The scale bars = 50  $\mu$ m.

**CD 34 immunostaining**

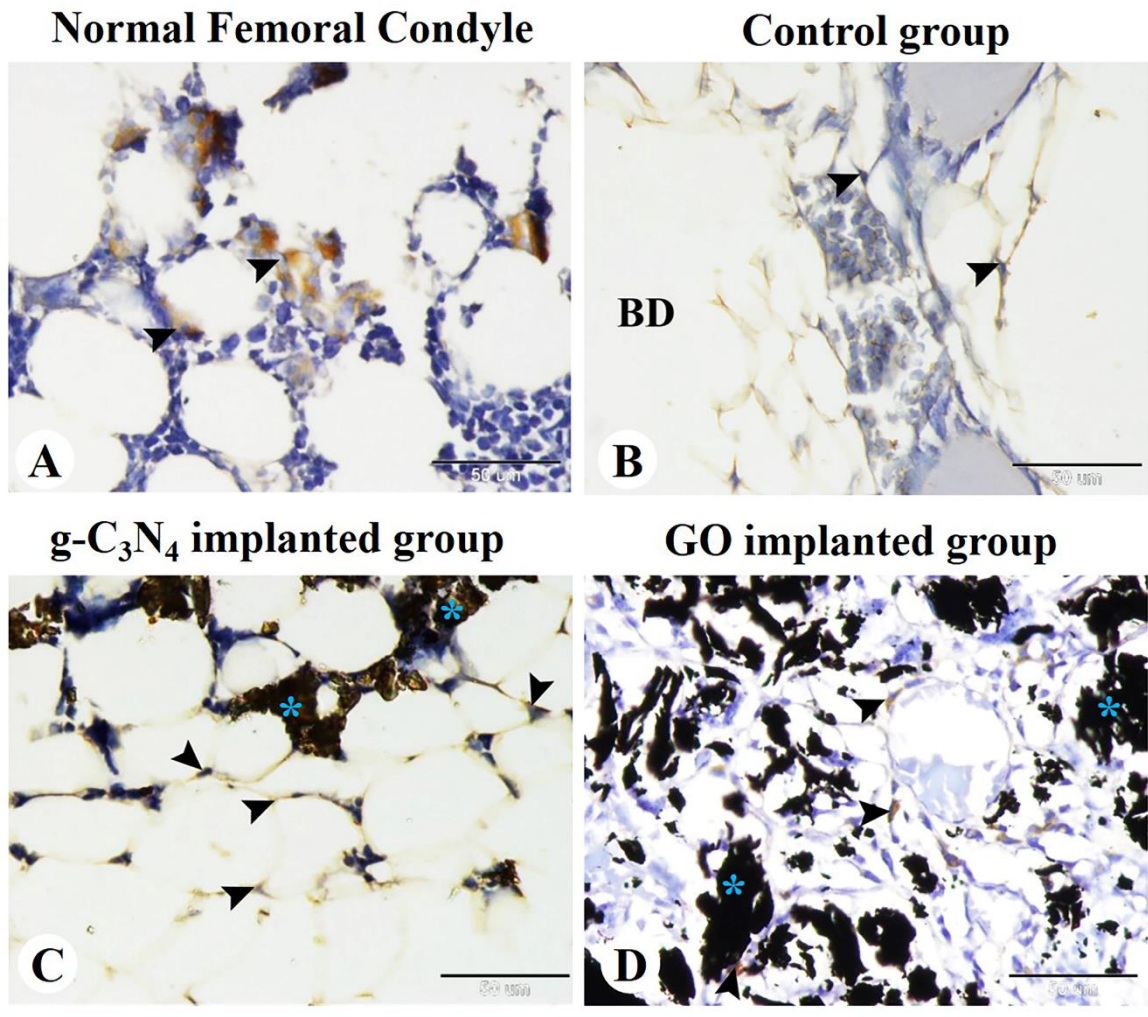

**Fig. supp 6.** Immunohistochemical staining of rabbit femoral condyle defect at week 12 postoperatively. The repair site of the femoral condyle in the control (B), g-C<sub>3</sub>N<sub>4</sub> implanted (C), and GO implanted (C) groups was stained with CD34 monoclonal antibody. BD: bone defect; Black arrowheads: CD34<sup>+</sup> mesenchymal stem cells; blue asterisks: implanted nanomaterial. Scale bars = 50 μm.
